# Supplementary material for: The TLX-miR-219 cascade regulates neural stem cell proliferation in neurodevelopment and schizophrenia iPSC model
Source: Springer Nature journal article supplement (doi:10.1038/ncomms10965), 2016-03-11
Supplement: 41467_2016_BFncomms10965_MOESM1633_ESM.pdf [file 41467_2016_BFncomms10965_MOESM1633_ESM.pdf]

## Supplementary Figures

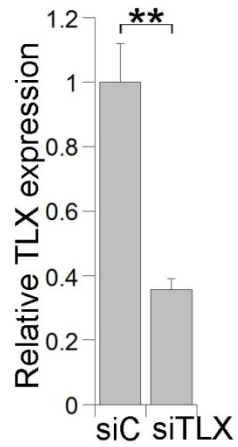

**Supplementary Fig. 1 Knockdown of TLX expression in NSCs.** Mouse NSCs were transduced with lentivirus expressing a scrambled control RNA (siC) or TLX siRNA (siTLX). The expression of TLX was determined by RT-PCR. Error bars are sd of the mean for all the quantification in this study. n=5. \*\*p< 0.01 by student's t-test.

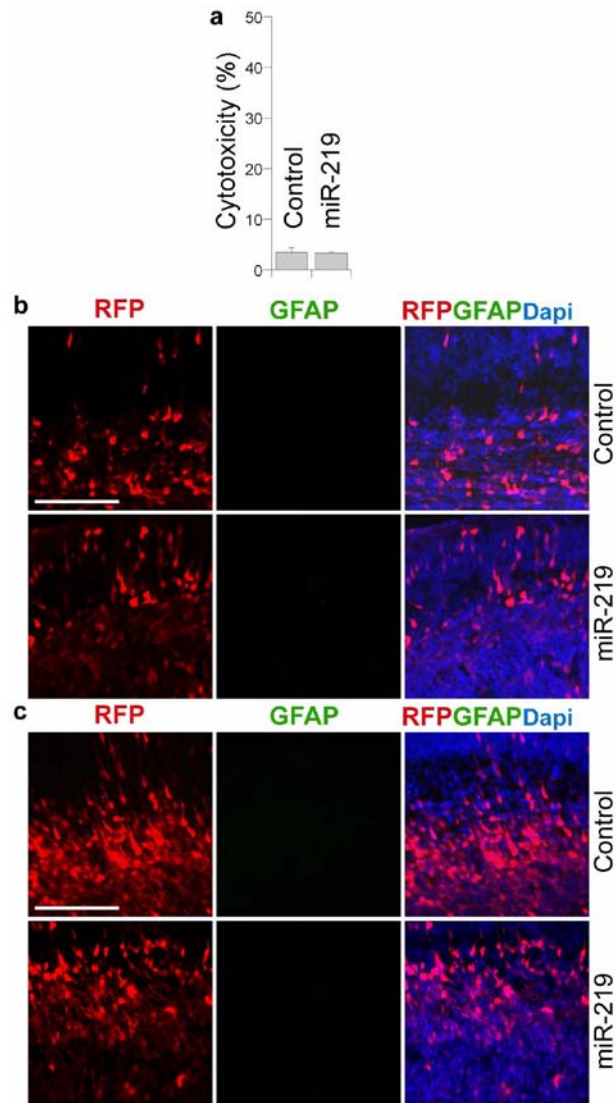

**Supplementary Fig. 2 Lack of toxicity and gliogenic induction in miR-219-transfected cells.**  
**a.** Minimal cytotoxicity in miR-219-transfected NSCs. Cytotoxicity was expressed as the percent of lactate dehydrogenase (LDH) release into the medium out of the total LDH activity. n=5. **b, c.** No induction of GFAP and MBP expression in miR-219-electroporated mouse brains at E15.5. Scale bar: 100  $\mu$ m.

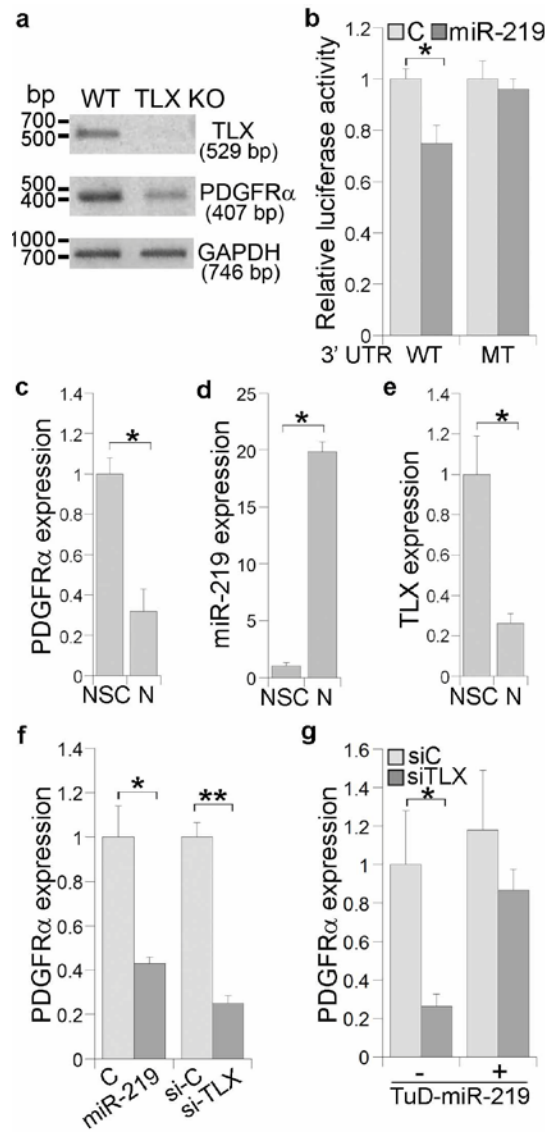

**Supplementary Fig. 3 TLX-miR-219 regulates the expression of PDGFR $\alpha$  in NSCs.**

**a.** PDGFR $\alpha$  expression was reduced in TLX KO mouse brains. The expression of PDGFR $\alpha$  in WT and TLX KO mouse brains was examined by RT-PCR. GAPDH was included as a loading control. Size markers are indicated. **b.** miR-219 represses PDGFR $\alpha$  3' UTR reporter with wild type (WT), but not mutant (MT) miR-219 recognition sites. n=3. \*p< 0.01 by student's t test. **c-e.** The expression pattern of miR-219 in NSCs and neurons inversely correlates with that of PDGFR $\alpha$  and TLX. The expression levels of PDGFR $\alpha$  (c), miR-219 (d) and TLX (e) in NSCs and cortical neurons (N) derived from embryonic mouse brains were determined by RT-PCR. n=3 and \*p< 0.001 by student's t test for panels c-e. **f.** The expression of PDGFR $\alpha$  is decreased in NSCs transfected with miR-219 or TLX siRNA as shown by RT-PCR analysis. n=5. \*p<0.01, \*\*p<0.001 by student's t test. **g.** Inhibition of PDGFR $\alpha$  expression by TLX siRNA could be rescued by the miR-219 decoy inhibitor, TuD-miR-219. The expression of PDGFR $\alpha$  in NSCs transduced with scramble control RNA (siC) or TLX siRNA (si-TLX), in the absence or presence of TuD-miR-219, was examined by RT-PCR. n=5. \*p<0.01 by student's t test.

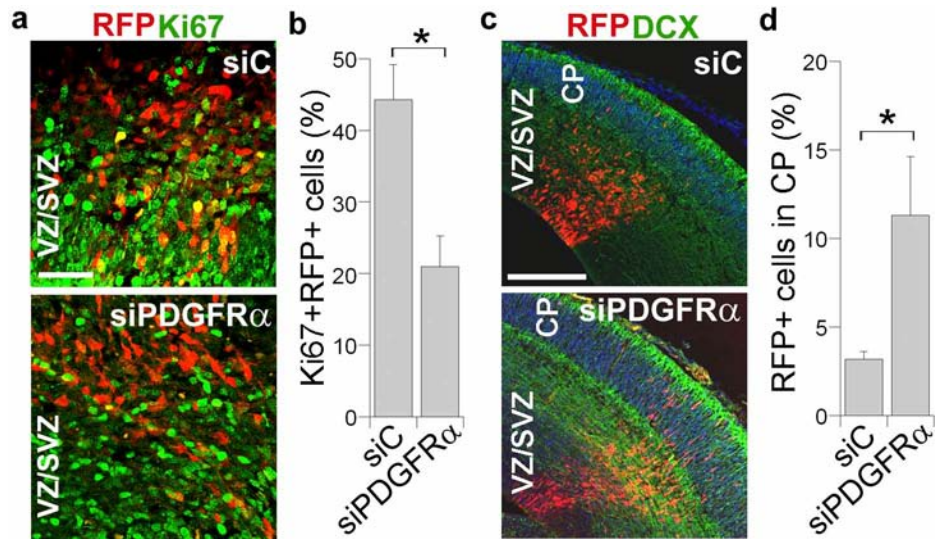

**Supplementary Fig. 4 Knockdown of PDGFR $\alpha$  inhibits NSC proliferation *in vivo*.**

**a.** Electroporation of PDGFR $\alpha$  siRNA decreased NSC proliferation in the VZ/SVZ of embryonic mouse brains. The electroporated cells were labeled with RFP and proliferating cells were labeled with Ki67. **b.** The percentage of RFP+Ki67+ cells out of total RFP+ cells in control RNA (siC) or PDGFR $\alpha$  siRNA (siPDGFR $\alpha$ )-electroporated brains is shown. n=3. \*p< 0.05 by student's t-test. **c.** Electroporation of PDGFR $\alpha$  siRNA led to precocious outward cell migration. The electroporated brains were labeled by RFP and stained for the neuronal marker doublecortin (DCX). **d.** The percentage of electroporated cells (RFP+) that migrated to the CP in siC and siPDGFR $\alpha$ -electroporated brains. n=3. \*p< 0.05 by student's t test. Scale bar: 50  $\mu$ m for panel a; 200  $\mu$ m for panel c.

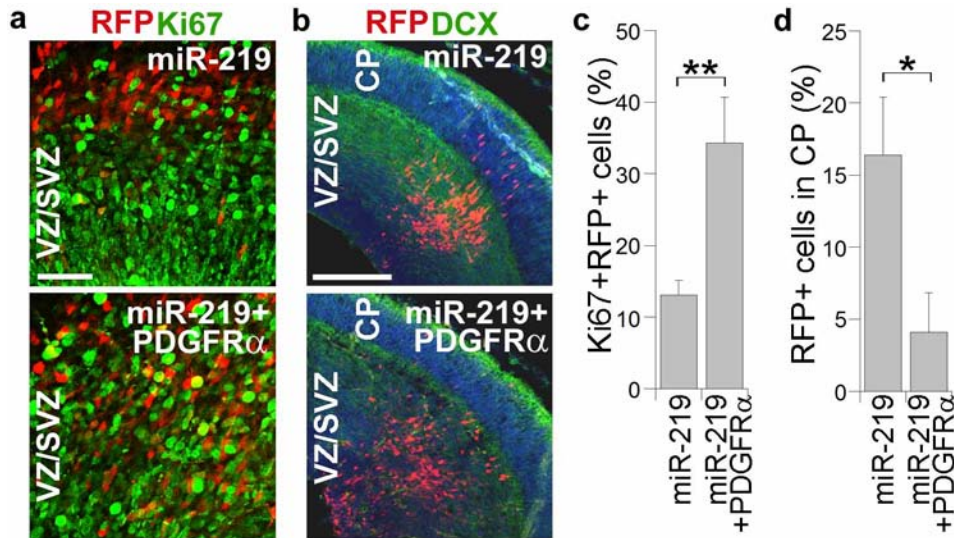

**Supplementary Fig. 5 PDGFR $\alpha$  functions downstream of miR-219 in mouse brains. a.** Co-electroporation with PDGFR $\alpha$  and miR-219 reversed the decrease in NSC proliferation induced by miR-219 in the VZ/SVZ of embryonic mouse brains. The electroporated cells were labeled with RFP and proliferating cells were labeled with Ki67. **b.** Co-electroporation with PDGFR $\alpha$  and miR-219 reversed precocious outward cell migration induced by electroporation with miR-219 alone. **c, d.** The percentage of RFP+Ki67+ cells (c) or cells migrated to the CP (d) out of total RFP+ cells in miR-219 or miR-219 and PDGFR $\alpha$ -electroporated brains is shown. n=3 for panels c & d. \*p < 0.05, \*\*p < 0.01 by student's t-test. Scale bar: 50  $\mu$ m for panel a; 200  $\mu$ m for panel b.

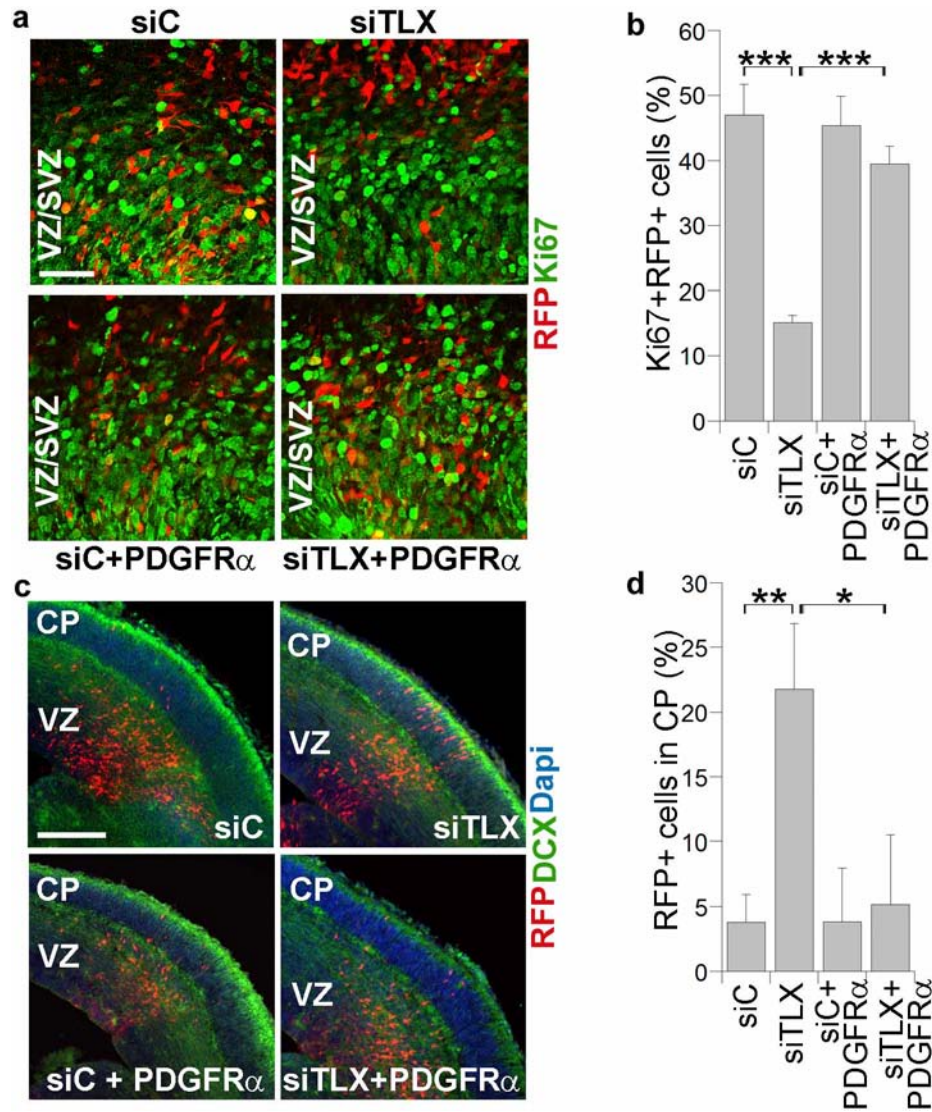

**Supplementary Fig. 6 PDGFR $\alpha$  functions downstream of TLX in mouse brains.** **a.** Co-electroporation with PDGFR $\alpha$  and TLX siRNA (siTLX + PDGFR $\alpha$ ) reversed the decrease in NSC proliferation in the VZ/SVZ induced by TLX siRNA alone. A control RNA (siC) was included as a negative control for TLX siRNA. **b.** The percentage of RFP+Ki67+ cells out of total RFP+ cells is shown. n=3. **c.** Co-electroporation with PDGFR $\alpha$  and TLX siRNA reversed the outward cell migration induced by TLX siRNA alone. The electroporated cells were labeled by RFP. **d.** The percentage of RFP+ cells that migrated to the CP out of total RFP+ cells is shown. n=3. \*p< 0.05, \*\*p< 0.01, \*\*\*p< 0.001 by student's t test. Scale bar: 50  $\mu$ m for panel a; 200  $\mu$ m for panel b.

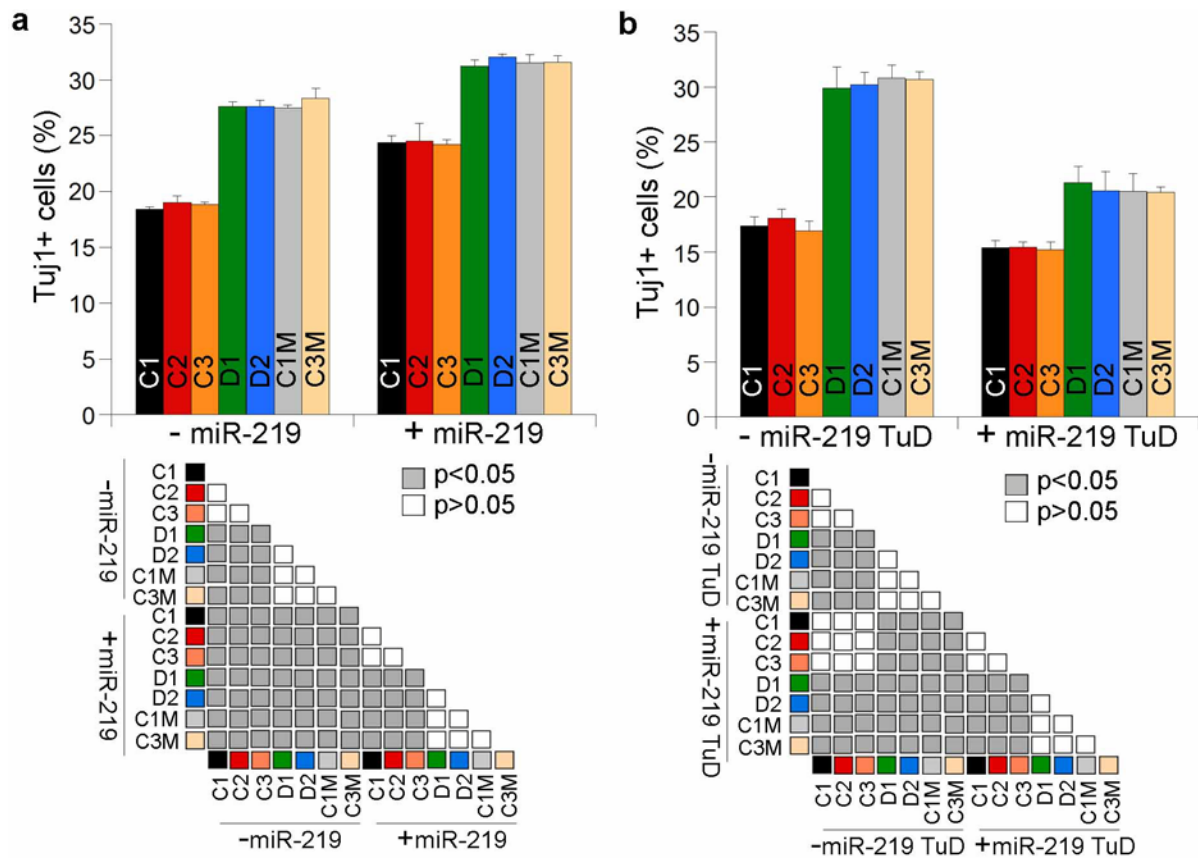

**Supplementary Fig. 7 miR-219 regulates neuronal differentiation in SCZ NSCs.**

**a.** Overexpression of miR-219 promotes neuronal differentiation in WT NSCs. WT (C1, C2, C3) and *DISC1*-mutant NSCs (D1, D2, C1M, C3M) were transduced with virus expressing a control vector (-miR-219) or miR-219-expressing vector (+miR-219). Neuronal differentiation rate was determined by the percentage of Tuj1+ cells. **b.** Inhibition of miR-219 reverses precocious neuronal differentiation in SCZ NSCs. The *DISC1*-mutant NSCs exhibited precocious differentiation, which was reversed by TuD-miR-219. Neuronal differentiation rate was determined by the percentage of Tuj1+ cells. n=5 for panels a & b. N represents experimental repeats. ANOVA test result was shown below the graph.

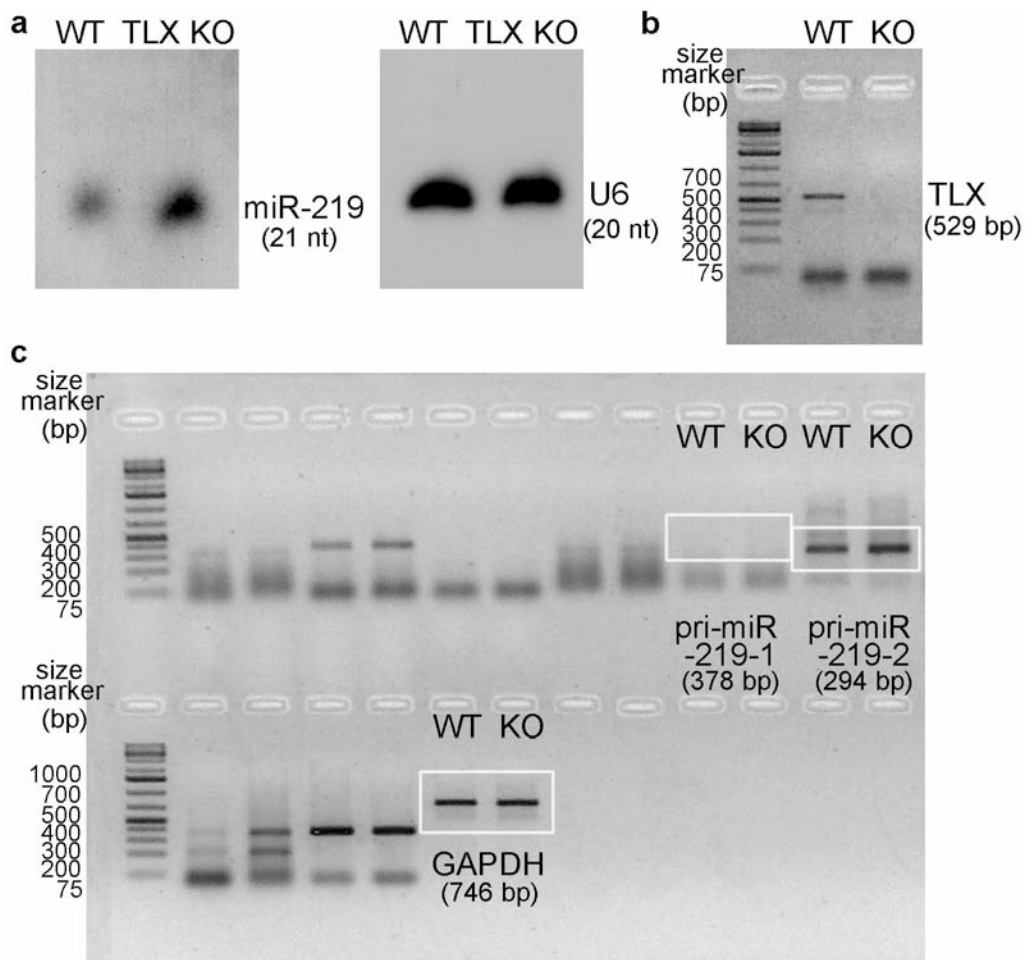

**Supplementary Fig. 8 Full gels for images in Fig. 1a & b.** **a.** Full gels for Fig. 1a. The size of the RNA is labeled. **b, c.** Full gels for Fig. 1b. Size markers are included. KO stands for TLX KO.



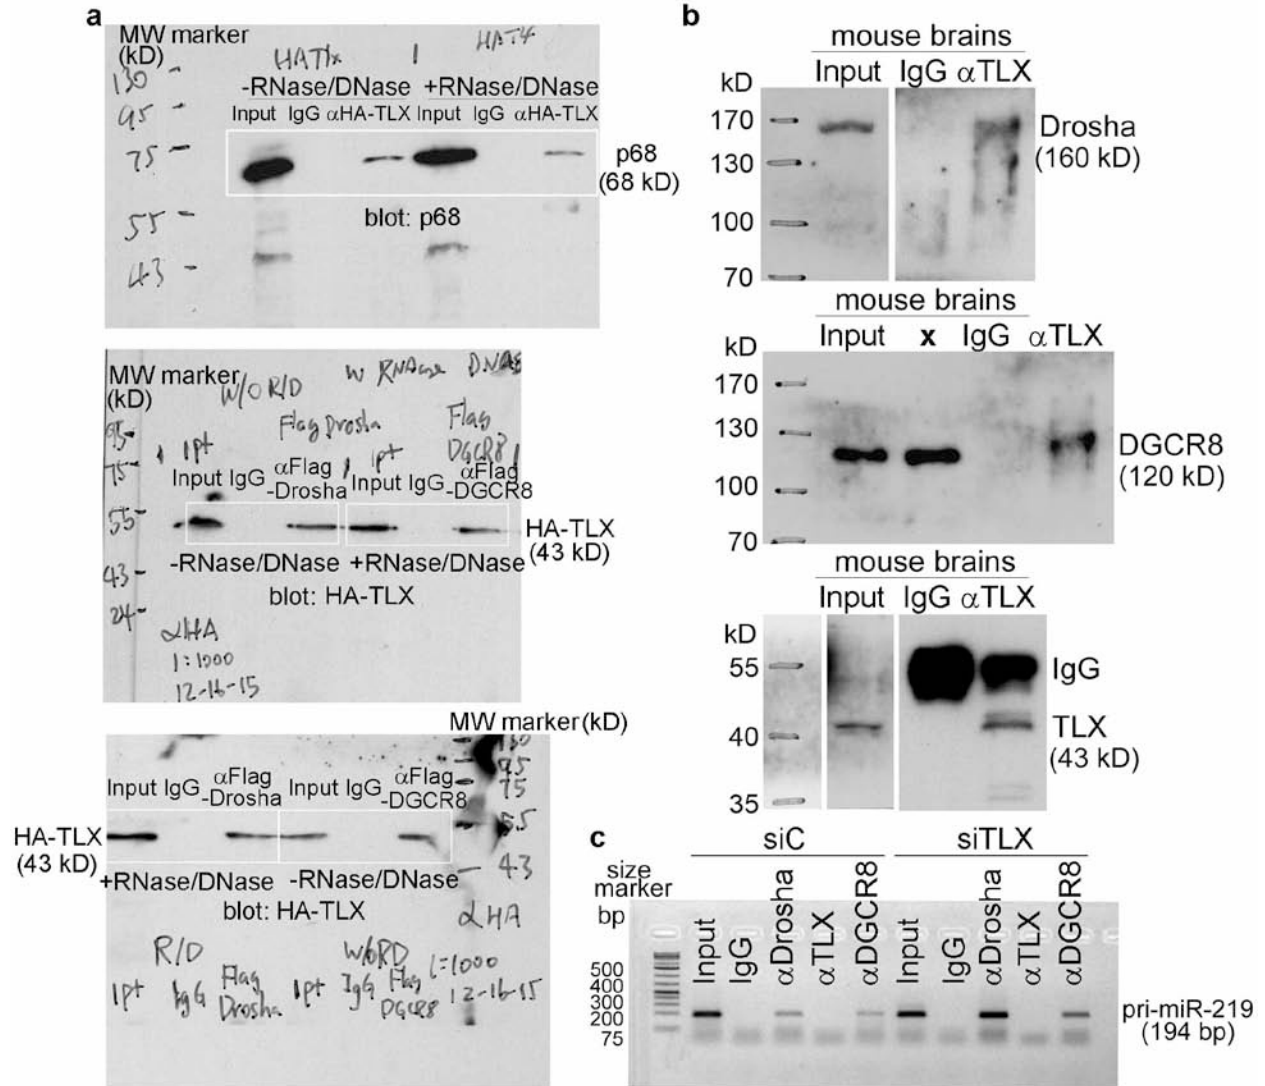

**Supplementary Fig. 9 Full gels for images in Fig. 2c, d & f. a.** Full gels for Fig. 2c. **b.** Full gels for Fig. 2d. Molecular weight markers are included for panels a and b. **c.** Full gels for Fig. 2f. Size markers are included.

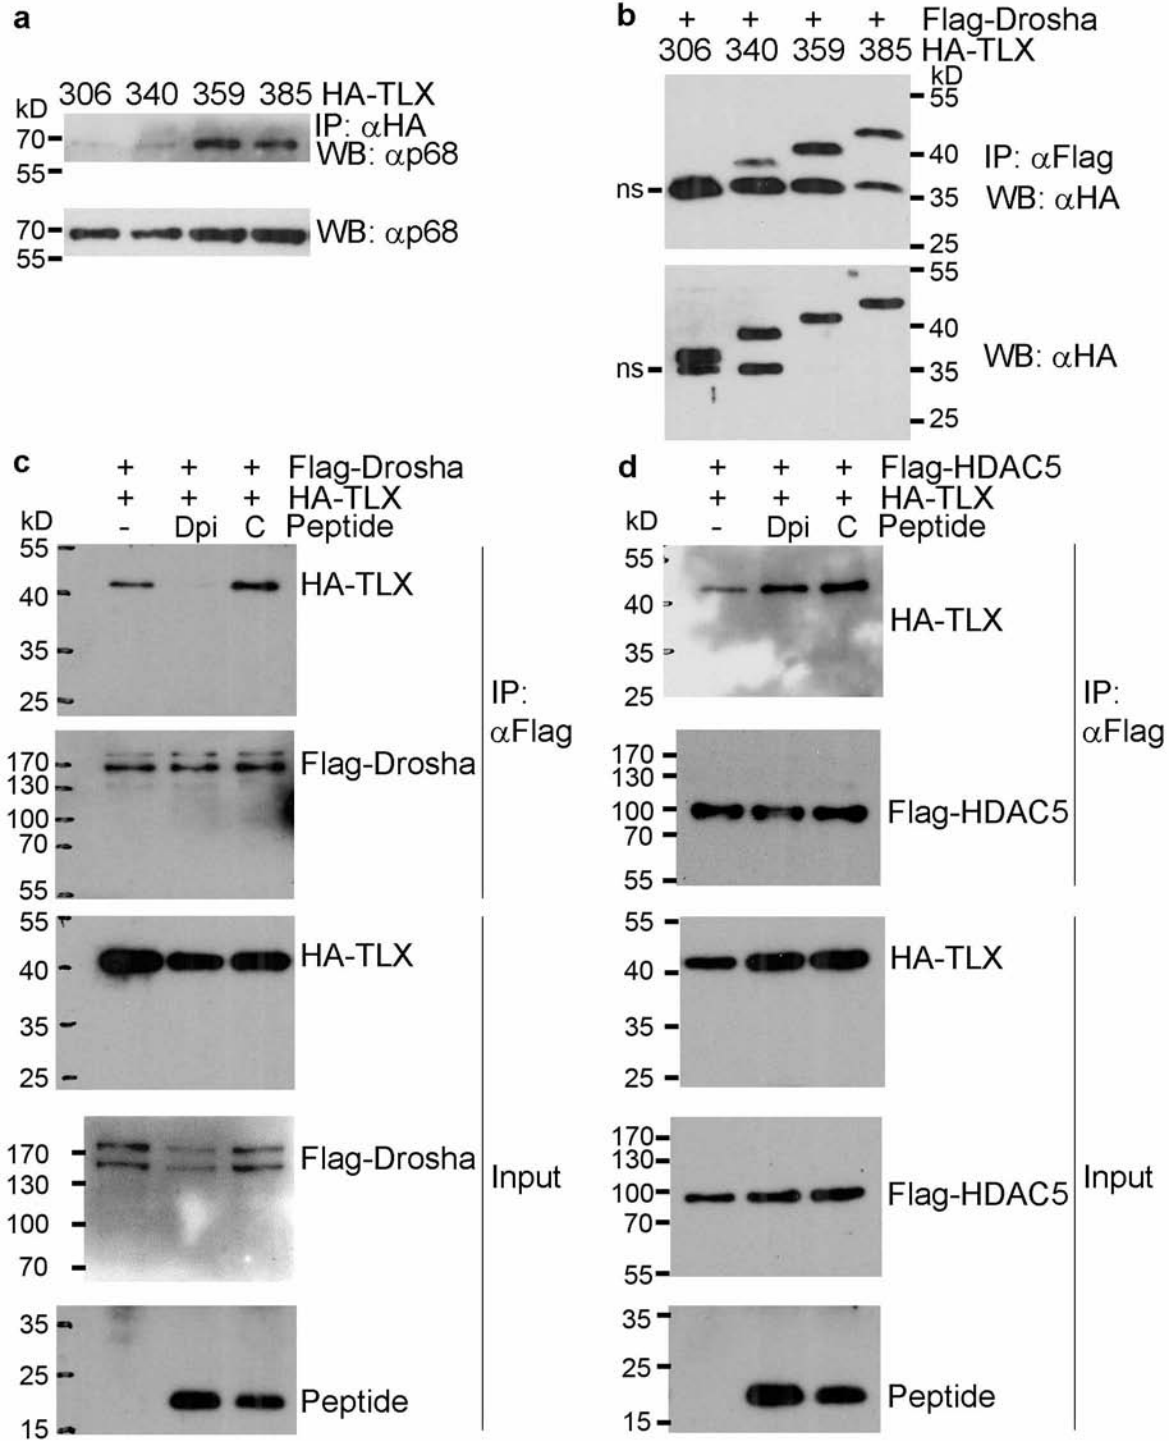

**Supplementary Fig. 10 Full gels for images in Fig. 5b-e. a.** Gels for Fig. 5b. Molecular weight markers are indicated. **b.** Full gels for Fig. 5c. Molecular weight markers are included. **c, d.** Full gels for Fig. 5d, e. Molecular weight markers are included.

**Supplementary Table 1. The list of Northern blot probes and RT-PCR primers**

| Gene           | Strand    | Sequence                       | Assay         |
|----------------|-----------|--------------------------------|---------------|
| miR-219        | Antisense | 5'-AGAATTGCGTTTGGACAATCA-3'    | Northern blot |
| U6             | Antisense | 5'-TATGGAACGCTTCTCGAATT-3'     | Northern blot |
| mTLX           | Forward   | 5'-GTCTTTACAAGATCAGCTGATG-3'   | RT-PCR        |
|                | Reverse   | 5'-ATGTCACTGGATTTGTACATATC-3'  | RT-PCR        |
| pri-miR-219-1  | Forward   | 5'-TTTCCCACGCCAGACATTCAC-3'    | RT-PCR        |
|                | Reverse   | 5'-GATCCCCAACTTCTCTCAAGC-3'    | RT-PCR        |
| pri-miR-219-2  | Forward   | 5'-TTGCCGAGCTTCTGCGAGGTA-3'    | RT-PCR        |
|                | Reverse   | 5'-TGTCCCCTCTTTGCATGCCAG-3'    | RT-PCR        |
| PDGFR $\alpha$ | Forward   | 5'-CAAACCTGACCATGCCACCAG-3'    | RT-PCR        |
|                | Reverse   | 5'-TCTCGATGGCACTCTCTTCCG-3'    | RT-PCR        |
| ROR $\beta$    | Forward   | 5'-TACGTGGTGGAGTTGCGCAAAG-3'   | RT-PCR        |
|                | Reverse   | 5'-CCCATGCAAGTTGCAGACTGC-3'    | RT-PCR        |
| LMO3           | Forward   | 5'-GTTTGGTGTAAACGGGAAACTGCG-3' | RT-PCR        |
|                | Reverse   | 5'-TCCTCGTAGTCTGTCTGGCAAAG-3'  | RT-PCR        |
| HMGA2          | Forward   | 5'-ACATCAGCCCAGGGACAACCT-3'    | RT-PCR        |
|                | Reverse   | 5'-CAAGAGTCCGCAGAGGAGGAT-3'    | RT-PCR        |
| EphrinB2       | Forward   | 5'-TTCAGCCCTAACCTCTGGGGT-3'    | RT-PCR        |
|                | Reverse   | 5'-AACCAGGAGATTGTTCCCGG-3'     | RT-PCR        |
| mGAPDH         | Forward   | 5'-CATCACCATCTTCCAGGAGC-3'     | RT-PCR        |
|                | Reverse   | 5'-GCTGTAGCCGTATTCATTGTC-3'    | RT-PCR        |
| pri-miR-219-2  | Forward   | 5'-TACGCAGTCCCGAGATCTGGTG-3'   | RT-PCR        |
|                | Reverse   | 5'-CAGCGTGGACCTCGTCTCTGTAG-3'  | RT-PCR        |
| pre-miR-219-2  | Forward   | 5'-CTGATTGTCCAAACGCAATTCTTG-3' | RT-PCR        |
|                | Reverse   | 5'-CAGATGTCCAGCCACAATTCTC-3'   | RT-PCR        |
| PDGFR $\alpha$ | Forward   | 5'-GTGGCCTGGACGAACAGAGACT-3'   | RT-PCR        |
|                | Reverse   | 5'-GGAACCTGTCTCGATGGCACTC-3'   | RT-PCR        |
| m TLX          | Forward   | 5'-GGTTCAGACAGCTCCGATTAGAC-3'  | RT-PCR        |
|                | Reverse   | 5'-TGGAGAGCGGCAATGGCGGCAGC-3'  | RT-PCR        |
| $\beta$ -Actin | Forward   | 5'-CCGAGCGTGGCTACAGCTTC-3'     | RT-PCR        |
|                | Reverse   | 5'-ACCTGGCCGTCAGGCAGCTC-3'     | RT-PCR        |
| hTLX           | Forward   | 5'-CTAAGAGTGTGCCAGCCTTC-3'     | RT-PCR        |
|                | Reverse   | 5'-TGTTAGCATCAACCGGAATGG-3'    | RT-PCR        |
| hGAPDH         | Forward   | 5'-CCTGTTCGACAGTCAGCCG-3'      | RT-PCR        |
|                | Reverse   | 5'-CGACCAAATCCGTTGACTC-3'      | RT-PCR        |
